# Supplementary material for: From Waste to Green: Water-Based Extraction of Polyphenols from Onion Peel and Their Adsorption on Biochar from Grapevine Pruning Residues
Source: MDPI journal article supplement (doi:10.3390/antiox12091697), 2023-08-31
Supplement: s1 [file s1]

Supplementary Table S1. Onion peels antioxidant capacity using MAC, UAE and MAE at different extraction conditions.

| Assay               | Condition           |                       | Method         |                |                | Method x temperature<br>x ratio (p – value) |
|---------------------|---------------------|-----------------------|----------------|----------------|----------------|---------------------------------------------|
|                     | Temperature<br>(°C) | Solid/liquid<br>ratio | MAC            | UAE            | MAE            |                                             |
| ORAC (μmol<br>TE/g) | 30                  | 1:25                  | 15.0 ± 0.4 g-i | 12.8 ± 0.3 e   | 2.22 ± 0.47 i  | ***                                         |
|                     |                     | 1:50                  | 15.8 ± 0.3 f-i | 15.4 ± 0.9 c-e | 3.16 ± 0.28 i  |                                             |
|                     |                     | 1:100                 | 15.7 ± 0.0 f-i | 18.8 ± 0.7 a-e | 14.4 ± 0.4 gh  |                                             |
|                     |                     | 1:250                 | 17.0 ± 0.7 d-i | 16.9 ± 0.3 b-e | 16.6 ± 0.9 d-h |                                             |
|                     |                     | 1:500                 | 19.1 ± 0.7 c-g | 15.9 ± 0.4 b-e | 13.6 ± 0.7 h   |                                             |
|                     | 45                  | 1:25                  | 10.3 ± 0.6 j   | 26.3 ± 9.5 ab  | 19.0 ± 0.2 b-e |                                             |
|                     |                     | 1:50                  | 13.8 ± 0.2 ij  | 20.0 ± 0.5 a-e | 18.1 ± 0.8 c-g |                                             |
|                     |                     | 1:100                 | 19.0 ± 0.4 c-h | 23.2 ± 0.6 a-e | 22.0 ± 1.6 a-c |                                             |
|                     |                     | 1:250                 | 16.3 ± 0.5 e-i | 24.0 ± 0.7 a-d | 16.7 ± 0.6 d-h |                                             |
|                     |                     | 1:500                 | 14.0 ± 0.6 ij  | 22.8 ± 0.1 a-e | 14.6 ± 1.6 f-h |                                             |
|                     | 60                  | 1:25                  | 14.8 ± 0.2 hi  | 17.8 ± 0.4 a-e | 19.3 ± 0.2 b-e |                                             |
|                     |                     | 1:50                  | 16.7 ± 0.3 e-i | 18.8 ± 0.1 a-e | 22.6 ± 0.6 ab  |                                             |
|                     |                     | 1:100                 | 20.5 ± 0.8 c-e | 22.4 ± 0.6 a-e | 23.8 ± 0.1 a   |                                             |
|                     |                     | 1:250                 | 21.7 ± 0.0 bc  | 16.7 ± 0.0 b-e | 21.5 ± 0.4 a-c |                                             |
|                     |                     | 1:500                 | 19.7 ± 1.4 c-f | 13.6 ± 0.2 de  | 17.2 ± 1.5 d-h |                                             |
|                     | 75                  | 1:25                  | 18.4 ± 0.9 c-h | 17.0 ± 0.5 b-e | 19.6 ± 0.7 b-e |                                             |
|                     |                     | 1:50                  | 19.2 ± 0.6 c-g | 18.4 ± 0.6 a-e | 18.0 ± 0.5 c-g |                                             |
|                     |                     | 1:100                 | 21.3 ± 0.6 b-d | 17.4 ± 0.1 a-e | 22.4 ± 1.1 ab  |                                             |
|                     |                     | 1:250                 | 17.7 ± 0.3 c-i | 17.3 ± 0.1 a-e | 15.8 ± 0.5 e-h |                                             |
|                     |                     | 1:500                 | 18.4 ± 0.0 c-h | 17.0 ± 0.9 b-e | 15.9 ± 0.4 d-h |                                             |
|                     | 90                  | 1:25                  | 17.7 ± 0.2 c-i | 18.8 ± 0.2 a-e | 20.1 ± 0.3 a-d |                                             |
|                     |                     | 1:50                  | 19.7 ± 2.1 c-f | 18.4 ± 0.5 a-e | 18.7 ± 1.3 b-f |                                             |

|                                 |    |       |                    |                    |                     |     |
|---------------------------------|----|-------|--------------------|--------------------|---------------------|-----|
| DPPH ( $\mu\text{mol}$<br>TE/g) |    | 1:100 | $27.3 \pm 1.1$ a   | $27.9 \pm 0.4$ a   | $18.5 \pm 0.3$ b-g  | *** |
|                                 |    | 1:250 | $25.5 \pm 1.1$ ab  | $24.6 \pm 0.0$ a-c | $18.0 \pm 0.6$ c-g  |     |
|                                 |    | 1:500 | $24.9 \pm 1.2$ ab  | $23.8 \pm 0.2$ a-d | $15.9 \pm 0.1$ e-h  |     |
|                                 | 30 | 1:25  | $24.9 \pm 0.9$ h   | $27.4 \pm 1.8$ i   | $18.1 \pm 0.7$ h    |     |
|                                 |    | 1:50  | $39.6 \pm 4.5$ c-h | $50.0 \pm 3.1$ c-f | $40.3 \pm 6.1$ c-g  |     |
|                                 |    | 1:100 | $44.9 \pm 2.2$ b-g | $51.5 \pm 1.7$ c-f | $49.4 \pm 1.2$ b-e  |     |
|                                 |    | 1:250 | $58.9 \pm 0.4$ ab  | $46.0 \pm 0.6$ e-h | $46.9 \pm 1.9$ b-f  |     |
|                                 |    | 1:500 | $39.2 \pm 3.8$ c-h | $41.2 \pm 2.5$ f-i | $37.8 \pm .3.1$ d-g |     |
|                                 | 45 | 1:25  | $30.9 \pm 4.9$ e-h | $30.9 \pm 1.4$ hi  | $35.5 \pm 1.3$ e-g  |     |
|                                 |    | 1:50  | $42.2 \pm 3.8$ b-h | $56.7 \pm 2.6$ a-f | $45.3 \pm 2.7$ b-f  |     |
|                                 |    | 1:100 | $42.1 \pm 1.6$ b-h | $61.3 \pm 6.5$ a-e | $57.8 \pm 1.4$ ab   |     |
|                                 |    | 1:250 | $41.3 \pm 2.3$ b-h | $54.8 \pm 0.6$ b-f | $52.6 \pm 4.5$ a-c  |     |
|                                 |    | 1:500 | $49.3 \pm 7.3$ a-e | $47.6 \pm 3.1$ d-g | $40.8 \pm 1.8$ c-g  |     |
|                                 | 60 | 1:25  | $26.4 \pm 0.8$ gh  | $32.5 \pm 1.8$ g-i | $34.1 \pm 0.8$ fg   |     |
|                                 |    | 1:50  | $46.9 \pm 1.5$ a-f | $55.4 \pm 1.3$ b-f | $51.9 \pm 3.4$ a-d  |     |
|                                 |    | 1:100 | $51.8 \pm 2.5$ a-c | $72.0 \pm 3.7$ a   | $53.9 \pm 4.0$ a-c  |     |
|                                 |    | 1:250 | $48.1 \pm 4.6$ a-e | $60.1 \pm 0.3$ a-e | $53.1 \pm 2.1$ a-c  |     |
|                                 |    | 1:500 | $41.0 \pm 2.9$ b-h | $52.5 \pm 4.9$ b-f | $41.8 \pm 1.8$ c-g  |     |
|                                 | 75 | 1:25  | $29.5 \pm 2.9$ f-h | $31.1 \pm 0.0$ hi  | $29.5 \pm 0.3$ gh   |     |
|                                 |    | 1:50  | $49.5 \pm 1.6$ a-e | $61.7 \pm 0.4$ a-e | $52.5 \pm 0.9$ a-c  |     |
|                                 |    | 1:100 | $57.1 \pm 3.7$ a-c | $60.9 \pm 2.1$ a-e | $64.2 \pm 3.7$ a    |     |
|                                 |    | 1:250 | $40.2 \pm 4.9$ c-h | $63.2 \pm 3.7$ a-d | $51.7 \pm 3.7$ a-d  |     |
|                                 |    | 1:500 | $39.1 \pm 0.9$ c-h | $54.5 \pm 0.7$ b-f | $36.1 \pm 1.1$ e-g  |     |
|                                 | 90 | 1:25  | $32.4 \pm 1.0$ d-h | $32.5 \pm 1.0$ g-i | $34.1 \pm 3.4$ fg   |     |
|                                 |    | 1:50  | $50.0 \pm 1.0$ a-d | $63.0 \pm 7.8$ a-d | $39.2 \pm 1.0$ c-g  |     |

|                     |    |       |                |                |                |     |
|---------------------|----|-------|----------------|----------------|----------------|-----|
| FRAP (μmol<br>TE/g) |    | 1:100 | 47.4 ± 6.5 a-f | 61.0 ± 1.6 a-e | 41.7 ± 2.4 c-g | *** |
|                     |    | 1:250 | 64.1 ± 2.6 a   | 68.7 ± 2.3 ab  | 46.2 ± 1.4 b-f |     |
|                     |    | 1:500 | 52.1 ± 3 a-c   | 64.3 ± 3.6 a-d | 35.6 ± 2.9 e-g |     |
|                     | 30 | 1:25  | 78.6 ± 7.5 g-j | 74.6 ± 0.8 l   | 20.0 ± 1.2 k   |     |
|                     |    | 1:50  | 60.3 ± 2.3 k   | 95.9 ± 1.0 g-j | 30.9 ± 1.5 k   |     |
|                     |    | 1:100 | 64.5 ± 3.1 jk  | 88.6 ± 1.8 i-k | 57.9 ± 2.7 j   |     |
|                     |    | 1:250 | 71.2 ± 3.0 i-k | 98.0 ± 1.0 g-i | 61.7 ± 2.0 ij  |     |
|                     |    | 1:500 | 84.1 ± 0.3 e-i | 75.1 ± 0.5 l   | 55.4 ± 4.0 j   |     |
|                     | 45 | 1:25  | 85.0 ± 4.6 e-i | 89.7 ± 2.4 i-k | 90.5 ± 2.4 c-e |     |
|                     |    | 1:50  | 87.4 ± 1.2 d-i | 84.4 ± 0.8 j-l | 79.5 ± 2.4 e-g |     |
|                     |    | 1:100 | 87.3 ± 1.1 d-i | 72.6 ± 5.4 l   | 77.0 ± 1.3 f-h |     |
|                     |    | 1:250 | 95.7 ± 3.7 c-g | 97.1 ± 2.0 g-i | 74.4 ± 3.4 g-i |     |
|                     |    | 1:500 | 88.2 ± 0.9 d-i | 88.9 ± 1.7 i-k | 58.5 ± 0.5 j   |     |
|                     | 60 | 1:25  | 96.6 ± 0.2 c-g | 108 ± 4 fg     | 101 ± 3 bc     |     |
|                     |    | 1:50  | 81.1 ± 1.3 f-j | 93.9 ± 1.5 h-j | 87.5 ± 1.8 d-f |     |
|                     |    | 1:100 | 88.1 ± 4.5 d-i | 90.8 ± 2.5 i-k | 84.3 ± 3.5 d-g |     |
|                     |    | 1:250 | 90.3 ± 1.2 c-h | 78.6 ± 1.6 kl  | 75.6 ± 1.0 f-h |     |
|                     |    | 1:500 | 76.0 ± 1.6 h-k | 74.6 ± 0.7 l   | 66.0 ± 5.0 h-j |     |
|                     | 75 | 1:25  | 79.5 ± 1.9 f-j | 112 ± 3 ef     | 121 ± 4 a      |     |
|                     |    | 1:50  | 100 ± 2 c-e    | 107 ± 1 fg     | 82.5 ± 1.4 d-g |     |
|                     |    | 1:100 | 108 ± 1 bc     | 104 ± 1 f-h    | 84.3 ± 0.9 d-g |     |
|                     |    | 1:250 | 103 ± 1 cd     | 98.2 ± 0.5 g-i | 87.1 ± 1.2 d-g |     |
|                     |    | 1:500 | 105 ± 1 b-d    | 95.5 ± 0.8 g-j | 79.4 ± 1.4 e-g |     |
|                     | 90 | 1:25  | 130 ± 3 a      | 133 ± 2 cd     | 120 ± 2 a      |     |
|                     |    | 1:50  | 121 ± 9 ab     | 121 ± 2 de     | 113 ± 2 ab     |     |

|       |           |            |                |
|-------|-----------|------------|----------------|
| 1:100 | 129 ± 2 a | 139 ± 5 bc | 102 ± 2 bc     |
| 1:250 | 139 ± 4 a | 152 ± 3 a  | 95.1 ± 0.7 cd  |
| 1:500 | 134 ± 1 a | 146 ± 1 ab | 76.9 ± 0.3 f-h |

---

MAC – maceration; UAE – ultrasound-assisted extraction; MAE – microwave-assisted extraction; TE – Trolox equivalents; \*\*\* – p-value ≤ 0.001.

Small letters represent different homogenous groups using Tukey's post-hoc test.
